# Supplementary material
Source: publisher figshare collection journal article supplement (https://gsajournals.figshare.com/articles/dataset/_/11862432)
Supplement: Supplementary file 1 [file 1]

| <b>Species</b>          | <b>Stock</b>            | <b>Source</b> | <b>Food Recipe</b> |
|-------------------------|-------------------------|---------------|--------------------|
| <i>D. americana</i>     | 15010-0951.00           | DSSC          | Cornmeal           |
| <i>D. cardini</i>       | 15181-2181.03           | DSSC          | Banana             |
| <i>D. erecta</i>        | 14021-0224.00           | DSSC          | Cornmeal           |
| <i>D. hydei</i>         | 15085-1641.04           | DSSC          | Cornmeal           |
| <i>D. melanogaster</i>  | Oregon-R                | BDSC          | Cornmeal           |
| <i>D. meridiana</i>     | 15081-1331.00           | DSSC          | Banana             |
| <i>D. mulleri</i>       | 15081-1371.01           | DSSC          | Banana-Opuntia     |
| <i>D. nigricruria</i>   | 15081-1381.02           | DSSC          | Banana-Opuntia     |
| <i>D. pseudoobscura</i> | 14011-0121.33           | DSSC          | Cornmeal           |
| <i>D. sechellia</i>     | 14021-0248.01           | DSSC          | Cornmeal           |
| <i>D. similis</i>       | 15182-2321.00           | DSSC          | Banana             |
| <i>D. simulans</i>      | <i>w</i> <sup>501</sup> | Barbash       | Cornmeal           |
| <i>D. virilis</i>       | 9B4-25                  | Blumenstiel   | Cornmeal           |
| <i>D. willistoni</i>    | 14030-0811.24           | DSSC          | Cornmeal           |
| <i>D. yakuba</i>        | 14021-0261.00           | DSSC          | Cornmeal           |

**Table S1:** The specific stocks of the species characterized in this study, the source of the stock, and the food media used to maintain the stock. DSSC: Drosophila Species Stock Center. BDSC: Bloomington Drosophila Stock Center. Barbash: Dr. Dan Barbash, Cornell University, Ithaca NY. Blumenstiel: Dr. Justin Blumenstiel, Kansas University, Lawrence KS.

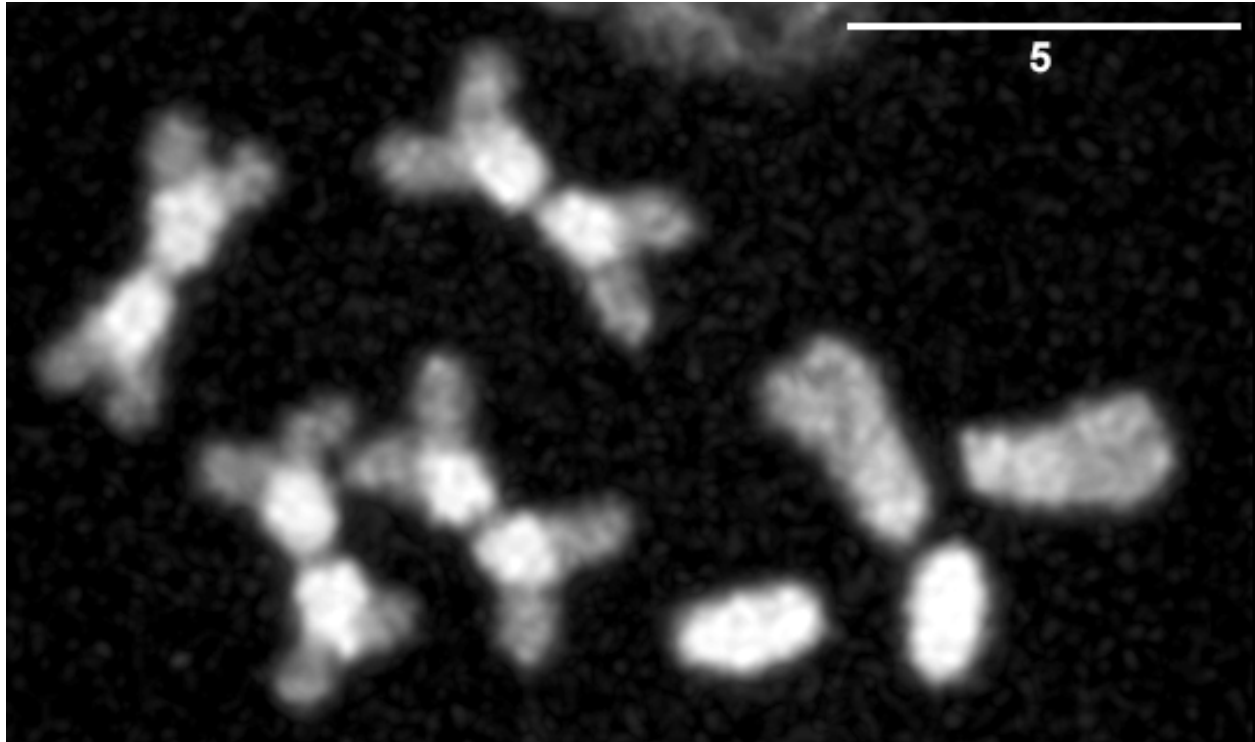

**Figure S1: *D. similis* Larval Brain Squash.** The *D. dunni* subgroup that includes *D. similis* is known to have two metacentric chromosomes, one acrocentric chromosome, and the dot chromosome (Cordiero et al 2014). This spread shows that the dot chromosomes (bottom, right of center) are large but do not appear to have fused with another Muller element, as five other euchromatic arms are evident.
